# Supplementary material
Source: ML conference proceedings conference paper supplement (https://proceedings.neurips.cc/paper_files/paper/2019/hash/83715fd4755b33f9c3958e1a9ee221e1-Abstract.html)
Supplement: Supplementary file [file 83715fd4755b33f9c3958e1a9ee221e1-Supplemental.zip]

## Appendix A

### Curvature dependent approximation bound of Submodular maximization in Eq. (3)

The combinatorial optimization problem in Eq. (3) is a submodular maximization with monotone non-decreasing submodular objective and a rank constraint. Simple vanilla greedy algorithm can yield an approximation factor of  $\alpha = 1 - e^{-1}$ . This result can be further improved when the objective  $F(A)$  is close to modular, e.g., when  $\lambda$  is sufficiently large. We therefore have the following Lemma:

**Lemma 1.** *Let  $F(A) = \lambda F_M(A) + F_S(A)$  where  $F_S(\cdot)$  is a monotone non-decreasing submodular function with curvature  $\kappa_S$ ,  $F_M(\cdot)$  is a non-negative modular function, both defined on ground set  $V$ , and  $\lambda \geq 0$ . Then  $\kappa_F \leq \frac{\kappa_S}{\lambda\beta + 1}$  where  $\beta = \min_{j \in V} F_M(j)/F_S(j)$ .*

*Proof.* We have

$$\begin{aligned}
 \kappa_F &= 1 - \min_{j \in V} \frac{\lambda F_M(j) + F_S(j|V \setminus j)}{\lambda F_M(j) + F_S(j)} \\
 &= \max_{j \in V} \frac{F_S(j) - F_S(j|V \setminus j)}{\lambda F_M(j) + F_S(j)} \\
 &= \max_{j \in V} \frac{1 - \frac{F_S(j|V \setminus j)}{F_S(j)}}{\frac{\lambda F_M(j)}{F_S(j)} + 1} \\
 &\leq \frac{\kappa_S}{\min_{j \in V} \frac{\lambda F_M(j)}{F_S(j)} + 1} = \frac{\kappa_S}{\lambda\beta + 1}
 \end{aligned}$$

where  $\beta \triangleq \min_{j \in V} \frac{F_M(j)}{F_S(j)}$ . □
